# Supplementary material for: Metallic Co9S8 nanosheets grown on carbon cloth as efficient binder-free electrocatalysts for the hydrogen evolution reaction in neutral media
Source: Royal Society of Chemistry journal article supplement (doi:10.1039/c5ta08611f), 2015-12-18
Supplement: c5ta08611f1.pdf [file c5ta08611f1.pdf]

Supporting Information (SI) *for*:

## **Metallic Co<sub>9</sub>S<sub>8</sub> nanosheets grown on carbon cloth as efficient binder-free electrocatalysts for hydrogen evolution reaction under neutral media**

Liang-Liang Feng,<sup>‡a</sup> Meihong Fan,<sup>‡a</sup> Yuanyuan Wu,<sup>a</sup> Yipu Liu,<sup>a</sup> Guo-Dong Li,<sup>a</sup> Hui Chen,<sup>a,c</sup> Wei Chen,<sup>b</sup> Dejun Wang<sup>d</sup> and Xiaoxin Zou<sup>\*a</sup>

<sup>a</sup>State Key Laboratory of Inorganic Synthesis and Preparative Chemistry, International Joint Research Laboratory of Nano-Micro Architecture Chemistry, College of Chemistry, Jilin University, Changchun 130012, P. R. China

<sup>b</sup>Institute of Theoretical Chemistry, International Joint Research Laboratory of Nano-Micro Architecture Chemistry, Jilin University Changchun 130023, P. R. China

<sup>c</sup>Department of Materials Science and Engineering, Jilin University, Changchun 130022, P. R. China

<sup>d</sup>Department of Chemistry, Tsinghua University, Beijing 100084, P. R. China

<sup>‡</sup> These authors contributed equally to this work.

E-mail: [xxzou@jlu.edu.cn](mailto:xxzou@jlu.edu.cn)

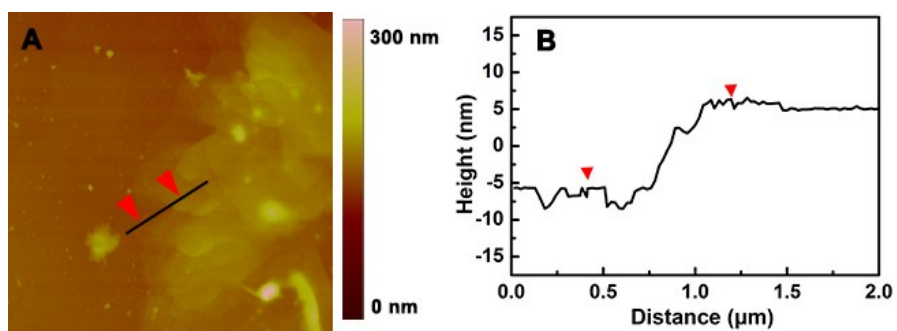

Figure S1 (A) AFM image of Co<sub>9</sub>S<sub>8</sub>/CC-1 and (B) the height along the corresponding line in the AFM image.

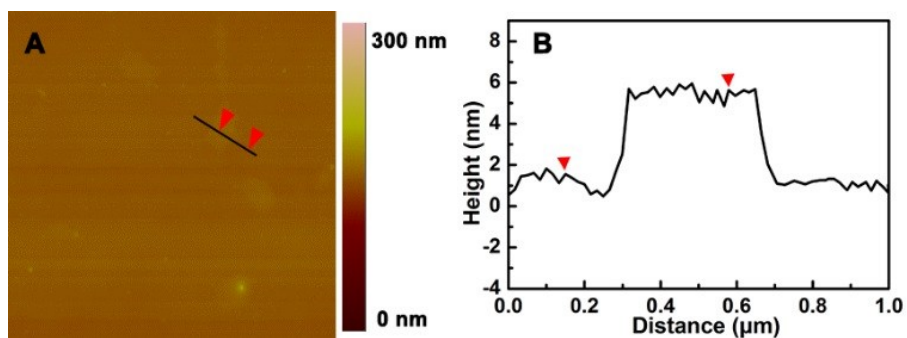

Figure S2 (A) AFM image of Co<sub>9</sub>S<sub>8</sub>/CC-2 and (B) the height along the corresponding line in the AFM image.

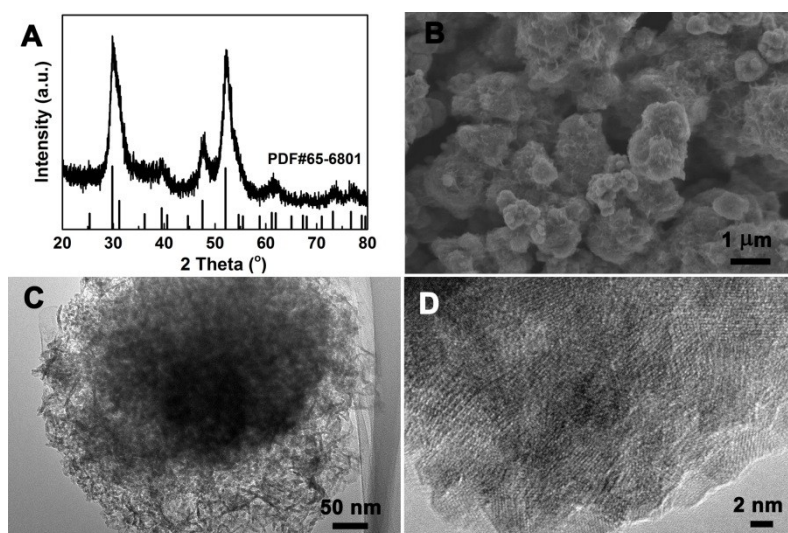

**Figure S3** (A) XRD pattern, (B) SEM image, (C) TEM image and (D) HRTEM image of  $\text{Co}_9\text{S}_8\text{-P}$ .

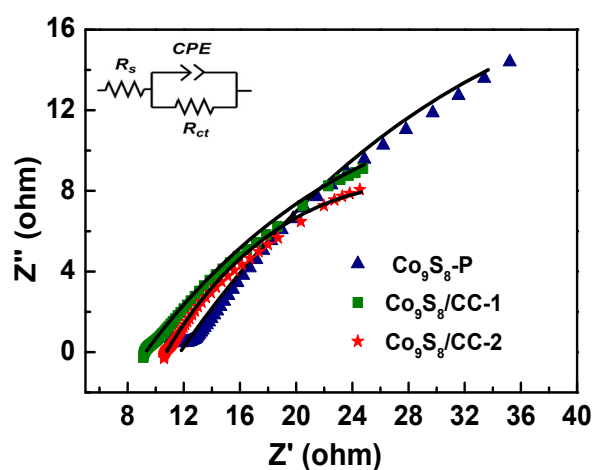

**Figure S4** Electrochemical impedance spectroscopy (EIS) Nyquist plots of  $\text{Co}_9\text{S}_8\text{-P}$ ,  $\text{Co}_9\text{S}_8/\text{CC-1}$  and  $\text{Co}_9\text{S}_8/\text{CC-2}$  in neutral solution. The applied potential for the EIS measurement is  $-0.226\text{ V vs. RHE}$ . The equivalent circuit used to fit the ESI response is shown in the inset.

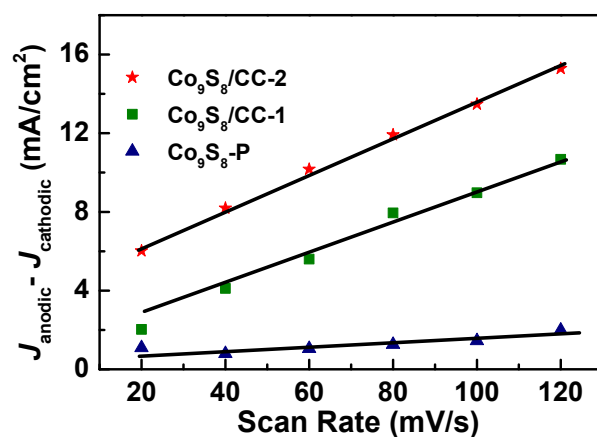

**Figure S5** Scan rate dependence of the current density at  $E = 0.259\text{ V vs. RHE}$  for the  $\text{Co}_9\text{S}_8\text{-P}$ ,  $\text{Co}_9\text{S}_8/\text{CC-1}$  and  $\text{Co}_9\text{S}_8/\text{CC-2}$  electrodes.

**Table S1** Comparison of the electrocatalytic activity of Co<sub>9</sub>S<sub>8</sub>/CC with some representative solid-state HER catalysts recently reported for neutral solutions.

| Catalyst                                                   | Loading density (mg/cm <sup>2</sup> ) | Current density ( <i>j</i> )                  | Overpotential at the corresponding <i>j</i> | Onset potential | Reference                                                        |
|------------------------------------------------------------|---------------------------------------|-----------------------------------------------|---------------------------------------------|-----------------|------------------------------------------------------------------|
| <b>Co<sub>9</sub>S<sub>8</sub>/CC-2</b>                    | <b>0.33</b>                           | <b>10 mA/cm<sup>2</sup></b>                   | <b>175 mV</b>                               | <b>25 mV</b>    | <b>This work</b>                                                 |
| FeP nanoparticles film grown on Carbon cloth               | 4.1                                   | 10 mA/cm <sup>2</sup>                         | 120 mV                                      | 19 mV           | <i>ACS Appl. Mater. Interfaces</i> , <b>2014</b> , 6, 20579      |
| CoP/Ti                                                     | 2                                     | 10 mA/cm <sup>2</sup>                         | 149 mV                                      | 40 mV           | <i>Chem. Mater.</i> <b>2014</b> , 26, 4326                       |
| Electrodeposited cobalt-sulfide                            | ----                                  | 10 mA/cm <sup>2</sup>                         | 160 mV                                      | 43 mV           | <i>J. Am. Chem. Soc.</i> <b>2013</b> , 135, 17699.               |
| FeP nanorod array                                          | 1.5                                   | 10 mA/cm <sup>2</sup>                         | 202 mV                                      | 20 mV           | <i>ACS Catal.</i> <b>2014</b> , 4, 4065.                         |
| Tungsten Phosphide Submicroparticles                       | 0.5                                   | 10 mA/cm <sup>2</sup>                         | 244 mV                                      | 54 mV           | <i>ACS Catal.</i> , <b>2015</b> , 5 (1), 145.                    |
| CuMoS <sub>4</sub>                                         | 0.0416                                | 2 mA/cm <sup>2</sup>                          | 210 mV                                      | 135 mV          | <i>Energy Environ. Sci.</i> <b>2012</b> , 5, 8912                |
| MoS <sub>2</sub> /N-doped graphene nanosheet aerogel       | 0.704                                 | 10 mA/cm <sup>2</sup>                         | 261 mV                                      | 236 mV          | <i>J. Mater. Chem. A</i> , <b>2014</b> , 2, 13795                |
| Carbon-armored Co <sub>9</sub> S <sub>8</sub> nanoparticle | ~0.28                                 | 10 mA/cm <sup>2</sup>                         | 280 mV                                      | 150 mV          | <i>ACS Appl. Mater. Interfaces</i> <b>2015</b> , 7, 980–988      |
| MoP nanosheets supported on carbon flake                   | ~0.36                                 | 1 mA/cm <sup>2</sup>                          | 300 mV                                      | ~300 mV         | <i>Applied Catalysis B: Environmental</i> <b>2015</b> , 164, 144 |
| Co-NRCNTs                                                  | ~0.28                                 | 1 mA/cm <sup>2</sup><br>10 mA/cm <sup>2</sup> | 330 mV<br>540 mV                            | ~140 mV         | <i>Angew. Chem. Int. Ed.</i> <b>2014</b> , 53, 4372.             |
| Metallic cobalt@cobalt-oxo/hydroxo phosphate               | -----                                 | 2 mA/cm <sup>2</sup>                          | 385 mV                                      | ~320 mV         | <i>Nature Mater.</i> <b>2012</b> , 11, 802                       |
| MoB                                                        | -----                                 | 1 mA/cm <sup>2</sup>                          | 250 mV                                      | 100 mV          | <i>Angew. Chem. Int. Ed.</i> <b>2012</b> , 51, 12703.            |
| CoB                                                        | ----                                  | 10 mA/cm <sup>2</sup>                         | 250 mV                                      | 70 mV           | <i>J. Power.Sources</i> <b>2015</b> , 279, 620.                  |
| WN nanorods array grown on carbon cloth                    | 2.5                                   | 2 mA/cm <sup>2</sup><br>10 mA/cm <sup>2</sup> | 186 mV<br>302 mV                            | ~100 mV         | <i>Electrochim. Acta</i> , <b>2015</b> , 154, 345.               |
